# Supplementary material
Source: PubMed Central journal article supplement (PMC8120738)
Supplement: NIHMS1630683-supplement-10488_2020_1084_MOESM1_ESM.pdf [file NIHMS1630683-supplement-10488_2020_1084_MOESM1_ESM.pdf]

Date: \_\_\_\_\_

Participant ID# \_\_\_\_\_

## Autism Model of Implementation for ASD Community Providers

### Individual Interview for ASD Agency Leaders

#### **Assessing Need:**

1. Is there a process that you or your agency uses to determine what new services children with ASD may need within or outside of your agency? Do you have a specific process for determining training needs of your staff?

#### **Intervention Factors:**

2. How does your agency learn about new interventions?
3. If you are considering implementing a new intervention, what are the most important factors that you take into consideration?

#### **Adoption Factors:**

4. Who chooses new interventions to be used at your agency?
5. What kinds of characteristics of staff are important to help facilitate adopting and implementing new interventions? What kinds of characteristics of agency leaders are important, do you think?
6. What is the attrition rate of support staff at your agency?
7. What kinds of considerations related to resources, such as funding and training, are considered when evaluating whether to adopt a new intervention?
8. If you decide to adopt a new intervention at your agency, how does your agency implement it? How do you feel about the way this works?

#### **Implementation Factors**

9. How does new staff at your agency get trained to deliver interventions?
10. Have you tried to use a new intervention at your agency? How successful was implementing it? Were there any problems? Were there any factors that helped?
11. Please describe the training (supervision) structure that your agency uses for direct service providers and supervisors.

#### **AMI**

12. We are developing a process to help agencies implement new interventions. We have thought of 4 phases: Assessing need, Evaluating the treatment, Adoption factors, and Implementation factors.
  - a. Are there any missing phases?
  - b. What factors should be included in these phases?
  - c. How would using a systematic process affect implementing new treatments at your agency?
